1 **Blocking chondrocyte hypertrophy in conditional *Evc* knockout mice does**  
2 **not modify osteoarthritis progression**

3 Ana Lamuedra<sup>1</sup>, Paula Gratal<sup>1</sup>, Lucía Calatrava<sup>2,3</sup>, Víctor Luis Ruiz-Perez<sup>2,3,4</sup>, Adrián  
4 Palencia-Campos<sup>2</sup>, Sergio Portal-Núñez<sup>5</sup>, Aránzazu Mediero<sup>1</sup>, Gabriel Herrero-  
5 Beaumont<sup>1</sup>, Raquel Largo<sup>1</sup>

6 <sup>1</sup>Bone and Joint Research Unit, Service of Rheumatology, IIS-Fundación Jiménez Díaz,  
7 Autonomous University of Madrid, 28040 Madrid, Spain

8 <sup>2</sup>Instituto de Investigaciones Biomédicas 'Alberto Sols', CSIC-UAM, 28029 Madrid, Spain

9 <sup>3</sup>CIBER de Enfermedades Raras (CIBERER), ISCIII, Spain

10 <sup>4</sup>Instituto de Genética Médica y Molecular (INGEMM), Hospital Universitario La Paz-IdiPaz-  
11 UAM, 28046 Madrid, Spain

12 <sup>5</sup>Bone Physiopathology Laboratory, Applied Molecular Medicine Institute (IMMA), Universidad  
13 San Pablo-CEU, CEU 6 Universities, Campus Montepincipe, 28925 Alcorcón, Madrid, Spain

14

15

16

17 **Correspondence**

18 Prof. Gabriel Herrero-Beaumont,  
19 Bone and Joint Research Unit  
20 IIS-Fundación Jiménez Díaz-UAM  
21 Rheumatology Department  
22 Reyes Católicos, 2  
23 28040 Madrid. Spain  
24 +34 91550 49 78  
25 GHerrero@fjd.es

26

27

28

29

30

31 **Title character count: 96**

32 **Manuscript character count: 52396**

33 **ABSTRACT**

34

35 **Background:** Chondrocytes in osteoarthritic (OA) cartilage acquire a hypertrophic-like  
36 phenotype, where Hedgehog (Hh) signaling is pivotal. Hh overexpression causes OA-like  
37 cartilage lesions, whereas its downregulation prevents articular destruction in mouse models.  
38 Mutations in *EVC* and *EVC2* genes disrupt Hh signaling, and are responsible for the Ellis-van  
39 Creveld syndrome skeletal dysplasia. Since Ellis-van Creveld syndrome protein (Evc) deletion is  
40 expected to hamper Hh target gene expression we hypothesized that it would also prevent OA  
41 progression avoiding chondrocyte hypertrophy. Our aim was to study Evc as a new therapeutic  
42 target in OA, and whether Evc deletion restrains chondrocyte hypertrophy and prevents joint  
43 damage in an Evc tamoxifen induced knockout (*Evc<sup>CKO</sup>*) model of OA.

44 **Methods:** OA was induced by surgical knee destabilization in wild-type (WT) and *Evc<sup>CKO</sup>* adult  
45 mice, and healthy WT mice were used as controls (n=10 knees/group). Hypertrophic markers  
46 and Hh genes were measured by qRT-PCR, and metalloproteinases (MMP) levels assessed by  
47 western blot. Human OA chondrocytes and cartilage samples were obtained from patients  
48 undergoing knee joint replacement surgery. Cyclopamine (CPA) was used for Hh  
49 pharmacological inhibition and IL-1 $\beta$  as an inflammatory insult.

50 **Results:** Tamoxifen induced inactivation of *Evc* inhibited Hh overexpression and partially  
51 prevented chondrocyte hypertrophy during OA, although it did not ameliorate cartilage  
52 damage in DMM-*Evc<sup>CKO</sup>* mice. Hh pathway inhibition did not modify the expression of  
53 proinflammatory mediators induced by IL-1 beta in human OA chondrocytes in culture.  
54 Hypertrophic – IHH – and inflammatory – COX-2 – markers co-localized in OA cartilage  
55 samples.

56 **Conclusions:** Tamoxifen induced inactivation of *Evc* partially prevented chondrocyte  
57 hypertrophy in DMM-*Evc<sup>CKO</sup>* mice, but it did not ameliorate cartilage damage. Our results  
58 suggest that chondrocyte hypertrophy per se is not a pathogenic event in the progression of  
59 OA.

60

61 **Keywords:** Osteoarthritis, Hedgehog, Chondrocyte Hypertrophy, Cartilage, Ellis-van Creveld.

62

63

64

65

## 66 INTRODUCTION

67 Osteoarthritis (OA) is a chronic joint disease mainly affecting articular cartilage, which  
68 undergoes erosion, characterized by extracellular matrix (ECM) degradation and cell  
69 alterations(1–5). Chronic biomechanical stress is the main factor triggering cartilage  
70 degradation(5). The resulting damage-associated molecular patterns (DAMPs) activate Toll-like  
71 receptors (TLR) and innate immunity in OA chondrocytes, evoking a local chronic inflammatory  
72 response with an increase in proinflammatory cytokines such as interleukin (IL)-1 or tumor  
73 necrosis factor (TNF). In turn, these cytokines induce the release of active metalloproteinases  
74 (MMP), aggrecanases and different proinflammatory mediators which activate the catabolic  
75 program characteristic of this disease(5). Together with inflammation, regenerative  
76 mechanisms are triggered by OA chondrocytes presumably as an attempt to repair the  
77 damaged tissue, such as the reactivation of signalling pathways operating during endochondral  
78 ossification of the growth plate, as Indian Hedgehog (IHH), WNT or NOTCH signaling(1,6,7).  
79 That is the reason why OA chondrocytes with this gene expression pattern are known as  
80 hypertrophic-like chondrocytes.

81 During limb development hypertrophic chondrocytes show a gradual increase in its cell  
82 size and varying gene expression, including Runx-related transcription factor 2 (RUNX2) and  
83 IHH, and progressively type X collagen (COL-10), MMP-13, receptor activator of nuclear factor  
84 kappa-B ligand (RANKL), and osteopontin (SPP1)(1,8). This developmental process, deeply  
85 coordinated by the IHH–parathyroid hormone-related protein (PTHrP) axis, drives an active  
86 ECM remodeling, until chondrocytes reach an apoptotic fate and leave a mineralized matrix for  
87 bone formation(1,8). Therefore, IHH has an essential role during embryonic and postnatal  
88 skeletal development and bone growth.

89 The Hedgehog (Hh) family of signaling molecules mediates the development of numerous  
90 organs during embryogenesis. However, in general, this signaling is physiologically repressed in  
91 the adult stage being only reactivated during tissue repair processes after injury, such as in  
92 lung epithelium, muscle, cartilage and bone(9).

93 Three Hh genes have been described in vertebrates, Sonic (SHH), Desert (DHH) and IHH,  
94 whose canonical signaling anchors to the primary cilium, a cellular structure highly specialized  
95 in the reception and transduction of mechanical and biochemical stimuli into the cell(10).  
96 Upon the arrival of a Hh ligand and its binding to the PTCH1 receptor, Smoothened (SMO) is  
97 released from PTCH1-mediated repression, and it translocates to the base of the cilium, where  
98 interacts with the EVC-EVC2 complex(11,12). This interaction promotes the activator function  
99 of the glioma associated oncogene (GLI) transcription factors and thus the expression of Hh

100 target genes, including Hh signaling components, such as PTCH1 and GLI1, and chondrocyte  
101 hypertrophy related genes(2,11–13).

102 Congruently with the hypertrophic-like phenotype, both human and animal OA cartilage  
103 exhibits increased levels of IHH and overexpression of components of the Hh pathway(14,15).  
104 Furthermore, chondrocytes in OA cartilage have also been described as morphologically  
105 hypertrophic cells with an increased size that are present in all the articular cartilage  
106 zones(16). These cell alterations also correlate with the expression of IHH in the cartilage and  
107 with the grade of tissue destruction(13,15,17). Experimental models have revealed that  
108 genetically modified mice with higher activation of Hh signaling (*Ptch1*<sup>+/-</sup>, *Col2a1-Gli2*-  
109 transgenic and *COL2-rtTA-Cre;Gt(ROSA)26Sor*<sup>tm1(Smo/YFP)Amc</sup>) show cartilage extracellular matrix  
110 remodeling, proteoglycan loss and chondrocyte fate alterations, together with an increased  
111 expression of chondrocyte hypertrophic markers, as *Col10a1* and *Mmp13*(14), although the  
112 characteristic cartilage OA lesions were not observed. On the contrary, *Smo* genetic  
113 downregulation (*COL2-rtTA-Cre;Smo*<sup>tm2Amc</sup>) and conditional deletion (*Rosa-CreER(T);Smo*<sup>fl/fl</sup>),  
114 and *Ihh* conditional deletion (*Col2a1-CreER*<sup>T2</sup>;*Ihh*<sup>fl/fl</sup>) attenuate surgically induced OA in  
115 mice(14,18,19). The effect of Hh pharmacological inhibition employing SMO and GLI inhibitors,  
116 such as cyclopamine (CPA) and GANT-61, has also been tested. The treatment with the Hh  
117 inhibitor C<sub>31</sub>H<sub>42</sub>N<sub>4</sub>O<sub>5</sub> prevents joint destruction in OA mice, and was associated with a decrease  
118 in OA markers, as *Adamts5* and *Col10a1*(14). The efficacy of these inhibitors on cartilage  
119 damage attenuation has also been tested in rodent models of severe OA, or adjuvant-induced  
120 arthritis(20,21).

121 On the other hand, blocking of SMO function results in a robust inhibition of Hh  
122 signaling(22,23). Potent SMO and GLI antagonists are particularly valuable for effectively  
123 inhibiting Hh signaling in several types of tumors with aberrant Hh activation, such as basal cell  
124 carcinoma and medulloblastoma(24). However, the accompanying adverse reactions, such as  
125 weight loss, fatigue, muscle spasms, alopecia, and dysgeusia(25), makes it questionable to  
126 consider SMO inhibitors as a feasible therapy for a chronic joint disease like OA.

127 Unlike other proteins of the Hh pathway, *Evc* works as a modulator of Hh signaling that  
128 lacks the critical role of other mediators of the Hh pathway, as SMO. In fact, a proportion of  
129 *Evc*<sup>-/-</sup> mice in a C57BL/6J;129 mixed background were found to be able to survive for at least 18  
130 days after birth, albeit exhibiting severe skeletal defects(26), whereas *Smo*<sup>-/-</sup> mice do not  
131 survive beyond 9.5 days of embryonic development(27). This suggests that *Evc* silencing may  
132 result in a partial blockade of Hh signaling, and may represent a more plausible therapeutic  
133 target for Hh inhibition and downstream gene repression in OA cartilage.

134 Thus, we hypothesized that *Evc* deletion would prevent chondrocyte hypertrophy  
135 associated to OA. In order to test whether *Evc* should be considered as a new therapeutic  
136 target in OA, we used our previously reported *Evc* tamoxifen (TAM) induced conditional  
137 knockout (*Evc<sup>CKO</sup>*) model(28) to specifically study if the blockade of Hh signaling and the  
138 entailing hypertrophy mechanisms exclusively during the adult stage could prevent the  
139 development of OA.

140

## 141 RESULTS

### 142 ***Evc* levels are drastically diminished in *Evc<sup>flox/-</sup>* mice**

143 Prior the study of *Evc* deletion on OA cartilage damage *in vivo*, we wanted to verify the  
144 efficacy of TAM on the deletion of *Evc* in adult *Evc<sup>CKO</sup>* mice. We used RT-qPCR to study *Evc*  
145 transcript levels in mice treated with TAM (*Evc<sup>CKO</sup>*) and with vehicle (*Evc<sup>flox/-</sup>*) as well as in WT  
146 mice, which were used as the reference group for normal *Evc* gene expression levels in healthy  
147 status. As predicted, *Evc<sup>CKO</sup>* mice did not express *Evc* in lung, heart, brain, muscle or bone tissue  
148 (Sup.Fig.1). Unexpectedly, *Evc* levels in *Evc<sup>flox/-</sup>* mice were drastically decreased with respect to  
149 WT mice, being more similar to those observed in *Evc<sup>CKO</sup>* animals (Sup.Fig.1). For this reason,  
150 WT mice, instead of *Evc<sup>flox/-</sup>*, were selected as the control group to study the effect of *Evc*  
151 deletion on OA cartilage damage *in vivo*.

152

### 153 ***Evc* deletion in DMM-*Evc<sup>CKO</sup>* mice does not prevent OA-associated cartilage damage**

154 We first studied cartilage damage in mice following 8 weeks post-surgery. Experimental  
155 OA due to knee joint destabilization evoked articular cartilage lesions in DMM-WT and DMM-  
156 *Evc<sup>CKO</sup>* mice compared with their respective healthy controls(28). However, we found no  
157 amelioration in cartilage damage of DMM-*Evc<sup>CKO</sup>* mice compared with DMM-WT animals, as  
158 showed by similar OARSI scores in both groups (Table 1).

159

### 160 **Hh signaling is effectively blocked in DMM-*Evc<sup>CKO</sup>* mice**

161 Meniscal destabilization-induced OA was responsible for an induction in Hh related genes  
162 – *Ptch1*, *Gli1*, *Evc* and *Ihh* – in the knees of DMM-WT mice in comparison with NO-WT healthy  
163 individuals, while the expression of these genes was decreased in DMM-*Evc<sup>CKO</sup>* mice compared  
164 with DMM-WT (Fig.1A-D). These results indicate that *Evc* deletion prevents Hh overexpression  
165 associated to OA.

166

### 167 ***Evc* deletion does not prevent cartilage catabolism in DMM-*Evc<sup>CKO</sup>* mice**

168 We studied MMP protein profile in the mouse knees to further assess tissue damage in  
169 the joint and to determine if *Evc* deletion could attenuate cartilage catabolism in DMM-*Evc*<sup>CKO</sup>  
170 mice. MMP-13, MMP-1 and MMP-3 protein levels increased in the knee joints of DMM-WT  
171 mice compared with NO-WT, while DMM-*Evc*<sup>CKO</sup> mice showed similar MMP levels compared  
172 with DMM-WT animals (Fig.2A-F). This suggests that despite Hh blockade mediated by *Evc*  
173 inactivation, cartilage catabolism remains strongly active in DMM-*Evc*<sup>CKO</sup> mice. The analysis of  
174 anabolic markers revealed substantial low levels of *Col2a1* gene expression in DMM-*Evc*<sup>CKO</sup>  
175 mice, whereas *Agg* transcript levels were similar between groups (Fig.2G,H).

176

### 177 **Chondrocyte hypertrophy is partially inhibited in DMM-*Evc*<sup>CKO</sup> mice**

178 The analysis of the gene expression levels of hypertrophic markers in the knee joints  
179 revealed increased levels of *Ihh*, *Col10a1* and *Alpl* during OA in DMM-WT mice, which  
180 decreased in the DMM-*Evc*<sup>CKO</sup> group with respect to DMM-WT animals (Fig.1D, Fig.3B,E). *Runx2*  
181 and *Sp7* levels were also diminished in DMM-*Evc*<sup>CKO</sup> mice compared with DMM-WT (Fig.3A,F).  
182 *Mmp13* and *Adamts5* mRNA levels were not modified between groups (Fig.3C,D). The thickness  
183 of the femur calcified cartilage showed an increasing trend in DMM-WT animals with respect  
184 to NO-WT mice, and decreased in DMM-*Evc*<sup>CKO</sup> mice compared with the DMM-WT group  
185 (Fig.3G,H). These results suggest a relevant role of *Evc* in the hypertrophy and calcification  
186 process associated to OA in this model.

187

### 188 **Human OA cartilage co-expresses hypertrophic and inflammatory phenotypes**

189 We suspected that the blockade of the hypertrophy response could trigger a higher  
190 inflammatory activation in OA chondrocytes. This would explain the fact that despite blocking  
191 hypertrophy we did not see improvement in cartilage damage in DMM-*Evc*<sup>CKO</sup> mice. To test this  
192 premise, we first aimed to determine whether chondrocytes polarize towards the acquisition  
193 of a hypertrophic vs an inflammatory phenotype in OA cartilage. With this purpose we  
194 analyzed the presence of IHH and COX-2 in human cartilage samples by immunofluorescence  
195 (Fig.4A,B). We found that both proteins co-localized in the same cells and areas in human OA  
196 cartilage (Fig.4D), suggesting that chondrocytes can express both hypertrophic and  
197 inflammatory proteins at the same time. This result demonstrates the coexistence of both  
198 pathological phenotypes in the same cell.

199

### 200 **Human OA chondrocytes inflammatory response is not modified by Hh inhibition**

201 Once we observed that both hypertrophic and inflammatory phenotypes co-localize in the  
202 same cell, we aimed to determine whether both signaling processes interact and mutually

203 regulate in OA chondrocytes. We studied if IL-1 beta-mediated inflammatory response could  
204 indirectly modify the synthesis of hypertrophic differentiation inducers in human OA  
205 chondrocytes. IL-1 beta insult decreased *GLI1* and *EVC* gene expression levels in IL-1 beta-  
206 stimulated chondrocytes compared with control cells (Fig.5B,C), and increased *IHH* gene  
207 expression levels (Fig.5D), while no changes were observed in *PTCH1* expression (Fig.5A).  
208 Then, we deepened in the inflammatory study in human OA chondrocytes to determine the  
209 effect of Hh signaling blockade on the response of chondrocytes to IL-1 beta-induced  
210 inflammation. We used CPA as a Hh inhibitor due to its direct antagonism by interaction with  
211 SMO(29). CPA-mediated Hh inhibition did not modify the gene expression of pro-inflammatory  
212 markers – *IL1B*, *MMP13*, *PTGS2*, *PTGER2*, *IL6*, *NOS2* and *CCL2* – with respect to chondrocytes  
213 not treated with the SMO inhibitor (Fig.5E-K). These data indicate that Hh inhibition, and  
214 therefore hypertrophy blockade, does not alter OA chondrocytes inflammatory response to IL-  
215 1 beta.

216

## 217 **DISCUSSION**

218 Our results show that surgically-induced OA in mice induced the activation of the Hh  
219 pathway, increasing *Ptch1*, *Gli1* and *Ihh* gene expression in the OA knees, as previous studies  
220 have observed in rodent models of OA(14,30). In addition, we observed that *Evc* levels were  
221 also increased in OA mouse knee joints.

222 The role of EVC and its specific activation have not been previously described in OA. Since  
223 EVC positively mediates Hh signaling, and DMM induces its overexpression, we proposed EVC  
224 as a new therapeutic target for inhibiting chondrocyte hypertrophy-like phenomena that are  
225 activated in OA. In addition, the expression of *Evc* seems to be mainly limited to cartilage  
226 tissue(26,31). Thus, a selective EVC inhibition would be specifically directed to articular hyaline  
227 cartilage in comparison to different Hh inhibitors that have a widespread effect in different  
228 tissues and organs.

229 Hh signaling has an essential role in limb and neural development and is dysregulated in  
230 disease states, such as in genetic (e.g. Bardet–Biedl syndrome) or neurodegenerative disorders  
231 (e.g. Parkinson's and Alzheimer's disease), cancer (e.g. basal cell carcinoma (BCC) and  
232 medulloblastoma), and OA(32,33). Hh function is also required for tissue repair and  
233 homeostasis, in coordination with WNT and TGF-beta/BMP signaling and G protein-coupled  
234 receptors actions(33), for example in lung epithelium regeneration(34), epidermal and hair  
235 follicle maintenance(35), and muscle regeneration(9).

236 The mechanisms of Hh signaling inhibition at different levels of the pathway have been  
237 deeply studied in the context of cancer research. Different Hh pharmacological inhibitors are

238 available for cancer treatment, mainly SMO and GLI1 inhibitors, which effectively suppress Hh  
239 activation(36,37). These Hh-targeted drugs have shown their efficacy in the treatment of a  
240 variety of tumors, including BCC, pancreatic or breast cancer(37). However, these Hh inhibitors,  
241 like vismodegib and sonidegib, are associated with different adverse events such as muscle  
242 spasms, alopecia, dysgeusia, weight loss, and fatigue(25,38).

243 The experimental use of these inhibitors in OA models has proven that SMO and GLI  
244 pharmacological inhibitors strongly restrain Hh signaling and exert a protective effect against  
245 OA progression(14,39,40). OA mice treated with the SMO inhibitor  $C_{31}H_{42}N_4O_5$  showed  
246 articular cartilage recovery, as well as a downregulation of *Ptch1*, *Gli1*, and Hh interacting  
247 protein (*Hhip*), together with a decrease in the hypertrophic markers *Adamts5* and  
248 *Col10a1*(14). In rats with adjuvant-induced arthritis, CPA reduced cartilage damage and  
249 inflammation, diminishing TNF- $\alpha$ , IL-1 beta, and IL-6 serum levels(21). Furthermore, the GLI  
250 inhibitor GANT-61, in combination with a low dose of the anti-inflammatory indomethacin,  
251 was found to synergistically reduce cartilage damage and inflammatory cytokines TNF- $\alpha$ , IL-2,  
252 and IL-6 in serum, through pyroptosis inhibition in chondrocytes(20).

253 Although these Hh inhibitory molecules have been tested in experimental OA models and  
254 have given promising results, the use of these compounds for the treatment of human OA does  
255 not seem acceptable due to their toxicity and the above mentioned associated adverse effects.  
256 Also, their long-term effects on the arthritic joint itself, and in other regenerative processes  
257 such as bone fracture healing, are still undefined. Due to the less critical nature of *Evc* in  
258 comparison to other mediators of the Hh pathway, *Evc* inhibition would provide a more  
259 plausible target for the treatment of OA. Although half of *Evc* knockouts were reported to die  
260 soon after birth, some can survive to adulthood under special heed in a C57BL/6J;129 mixed  
261 genetic background. In contrast, *Smo* knockouts fail embryonic development and die at  
262 E9.5(26,32,41). Thus, *Evc* blockade would display a partial inhibition of the Hh pathway in  
263 comparison with the vast inhibition induced by the blockade of other mediators, such as SMO  
264 or IHH.

265 Aside from the classical Hh activation, several pathways such as MAPK/MEK/ERK,  
266 PI3K/AKT/mTOR, TGF- $\beta$  and PKC signaling, modulate GLI1 and GLI2 transcriptional activity  
267 through non-canonical Hh activation(42). Particularly in OA, Hh signaling interacts with the  
268 NOTCH, WNT, FGF and mTOR pathways(2). Furthermore, inflammatory pathways such as TNF-  
269  $\alpha$ /mTOR, potentiate GLI1 activity in a SMO-independent manner(43,44). Overall, signaling  
270 cascades and cellular responses triggered by Hh pathway seem to be highly context-  
271 dependent(2).



272 We utilized an *Evc*<sup>CKO</sup> model in mice females combined with DMM, and we demonstrated  
273 that *Evc*<sup>CKO</sup> effectively inhibited Hh signaling overexpression during OA triggered by DMM, and  
274 decreased chondrocyte hypertrophic markers. We employed this OA model, in which mice  
275 developed mild to moderate OA alterations(45), in order to test plausible beneficial effects of  
276 hypertrophy blockade. We observed a general decrease in the expression of *Ihh*, *Runx2*,  
277 *Col10a1*, *Alpl* and *Sp7* in the joints of DMM-*Evc*<sup>CKO</sup> mice in comparison to DMM-WT animals.  
278 Furthermore, tamoxifen induced inactivation of *Evc* accounted for a substantial prevention of  
279 calcified cartilage thickening in DMM-*Evc*<sup>CKO</sup> mice compared to DMM-WT mice.

280 Although *Evc*<sup>CKO</sup> showed a decrease in Hh induction induced by OA, together with a lower  
281 hypertrophy and calcification progression, no amelioration of cartilage damage was observed  
282 in DMM-*Evc*<sup>CKO</sup> mice compared with DMM-WT. We have previously demonstrated that DMM-  
283 WT and DMM-*Evc*<sup>CKO</sup> mouse joints also exhibited similar subchondral bone sclerosis associated  
284 to DMM(28).

285 Research in *Evc* null mice have shed light on its physiological role and demonstrated that  
286 EVC localises at the base of the primary cilium and mediates Hh signaling in chondrocytes and  
287 osteoblasts(26,46). Still, the role of *Evc* in the cartilage seems to be restricted to skeletal  
288 development and bone growth, with an unclear role in the adult tissue. Specifically in OA,  
289 studies have been conducted investigating the function of the primary cilium in chondrocytes.  
290 An increased cilium length and prevalence of ciliated chondrocytes have been associated to  
291 tissue erosion and mild to severe OA lesions in the cartilage(47,48). Also cilia orientation  
292 undergoes alterations in the OA cartilage. While healthy chondrocytes orient their cilium away  
293 from the cell surface, chondrocytes in OA cartilage direct their primary cilia into the core of OA  
294 chondrons(48). Alterations in primary cilium structure and assembly have also been associated  
295 with a Hh-mediated mechanosensitive diminished response in bovine articular  
296 chondrocytes(49). Similarly, primary cilium depletion in chondrocytes is responsible for  
297 impeded GLI3 processing to the repressor form of the transcription factor, thus promoting  
298 increased Hh signaling and OA markers(50). *Evc*<sup>-/-</sup> chondrocytes do not show alterations in  
299 ciliogenesis(26). Yet, *Evc* absence does produce chondrocyte dysfunction, as can be asserted  
300 by the severe skeletal and growth alterations of *Evc*<sup>-/-</sup> and growth plate column disarrangement  
301 in *Evc*<sup>CKO</sup> adult mice(26,28). It still remains unknown how inactivation of *Evc* in *Evc*<sup>CKO</sup> mice  
302 might influence articular cartilage quality in the long term.

303 The extremely low *Col2a1* transcript levels found in DMM-*Evc*<sup>CKO</sup> mice are consistent with  
304 the alteration of the genetic locus of *COL2A1* in patients with osteochondrodysplasias(51). In  
305 an Ellis–van Creveld experimental model in calf with an *EVC2* mutation, abnormal *COL2A1*  
306 expression was histologically found in the physis, attributed to an accelerated *COL2A1*

307 degradation(52). In contrast, our data show a COL2A1 synthesis defect in DMM-*Evc*<sup>CKO</sup> mice.  
308 The low *Col2a1* transcript levels, together with the relatively high MMP-associated catabolism,  
309 particularly MMP-13 and MMP-1, maintained in the knee joints of DMM-*Evc*<sup>CKO</sup> mice, may have  
310 contributed to a more rapid progression of cartilage damage in DMM-*Evc*<sup>CKO</sup> mice than a priori  
311 anticipated. Both findings matched histological cartilage damage in DMM-*Evc*<sup>CKO</sup> joints and its  
312 equal OA progression to DMM-WT mice(28).

313 Both hypertrophy-like alterations and inflammation in OA chondrocytes have been  
314 described as characteristic phenomena in this disease. Recent data from our laboratory  
315 demonstrate that hypertrophic chondrocytes can be found in all hyaline cartilage layers, and  
316 not within a specific location(16). In this work, we have demonstrated that these signals can be  
317 simultaneously found in OA chondrocytes, since we were able to co-localize IHH and COX-2 in  
318 human OA chondrocytes. The co-localization of both hypertrophy and inflammatory markers in  
319 human OA cartilage suggests that the acquisition of the hypertrophic-like phenotype does not  
320 exclude the expression of an inflammatory profile. Our data indicate the presence of a  
321 complex signaling network modulating chondrocyte responses in OA.

322 In line with this data, it could be possible that IHH-signaling down-regulation observed in  
323 *Evc*<sup>CKO</sup> mice could exacerbate the inflammatory response in OA chondrocytes, being  
324 responsible for the absence of a protective effect on cartilage degradation observed in DMM-  
325 *Evc*<sup>CKO</sup> mice, in comparison to DMM-WT. In fact, it has been previously shown that both  
326 pathways could be able to regulate each other. IL-1 beta stimulation would decrease the  
327 activation of the Hh pathway(53), while Hh activation has been long associated with OA  
328 cartilage degradation due to an increase in catabolic enzymes such as ADAMTS5 and MMP-  
329 13(13,14,18). However, Thompson and co-workers observed that Hh pathway activation  
330 induced by recombinant-Ihh did not stimulate cartilage degradation in healthy bovine articular  
331 chondrocytes(53). On the other hand, some reports have even postulated that Hh may induce  
332 anti-inflammatory responses(54,55). Genetic or pharmacologic Hh inhibition increased the  
333 presence of inflammatory mediators, whereas *Gli1* overexpression seemed to ameliorate  
334 inflammatory outcomes in mouse models of colitis and acute pancreatitis through the  
335 induction of the anti-inflammatory cytokine IL-10(54,55).

336 Thus, employing *in vitro* studies, we investigated whether Hh signaling inhibition might  
337 trigger a higher inflammatory response in human OA chondrocytes. Our data indicated that IL-  
338 1 beta accounted for an inhibition in Hh pathway in human OA chondrocytes, particularly  
339 decreasing *GLI1* and *EVC* gene expression. In contrast, we observed that human OA  
340 chondrocytes did not modify their inflammatory response to IL-1 beta under Hh pathway  
341 inhibition.

342 Overall, our results showed that *Evc*-mediated Hh inactivation partially prevented  
343 chondrocyte hypertrophy but did not ameliorate OA cartilage damage in DMM-*Evc*<sup>ckO</sup> mice.  
344 These data suggest that a partial blockade of the Hh pathway through tamoxifen induced  
345 inactivation of *Evc* is not a therapeutic target for mild/incipient OA. In this OA model, we have  
346 demonstrated that chondrocyte hypertrophy was associated to Hh signaling activation, but it is  
347 not a pathogenic event in the development of the disease. In this sense, chondrocyte  
348 hypertrophy could be a frustrated regenerative mechanism that correlates with OA  
349 progression, but not a leading cause of cartilage degeneration per se.

350

## 351 MATERIALS AND METHODS

| Reagents and Tools                                                                                                                                                                                                                                                                                                                                                                                                                                                                                                                                                                                                                                                                                                                                       |                                  |
|----------------------------------------------------------------------------------------------------------------------------------------------------------------------------------------------------------------------------------------------------------------------------------------------------------------------------------------------------------------------------------------------------------------------------------------------------------------------------------------------------------------------------------------------------------------------------------------------------------------------------------------------------------------------------------------------------------------------------------------------------------|----------------------------------|
| Material                                                                                                                                                                                                                                                                                                                                                                                                                                                                                                                                                                                                                                                                                                                                                 | Supplier                         |
| Rabbit polyclonal anti-mouse MMP-13 (1/6000; ab39012)                                                                                                                                                                                                                                                                                                                                                                                                                                                                                                                                                                                                                                                                                                    | Abcam, Cambridge, UK             |
| Rabbit polyclonal anti-mouse MMP-1 (1/500; ab137332)                                                                                                                                                                                                                                                                                                                                                                                                                                                                                                                                                                                                                                                                                                     | Abcam, Cambridge, UK             |
| Rabbit monoclonal anti-mouse MMP-3 (1/10000; ab52915)                                                                                                                                                                                                                                                                                                                                                                                                                                                                                                                                                                                                                                                                                                    | Abcam, Cambridge, UK             |
| EZ-Blue gel staining reagent                                                                                                                                                                                                                                                                                                                                                                                                                                                                                                                                                                                                                                                                                                                             | Sigma-Aldrich, St Louis, MO, USA |
| TRIzol reagent                                                                                                                                                                                                                                                                                                                                                                                                                                                                                                                                                                                                                                                                                                                                           | MRC, Cincinnati, OH, USA         |
| TaqMan probes:<br><i>Ptch1</i> (Mm00436026_m1), <i>Evc</i> (Mm00469587_m1), <i>Gli1</i> (Mm00494645_m1), <i>Ihh</i> (Mm00439613_m1), <i>Runx2</i> (Mm00501584_m1), <i>Col10a1</i> (Mm00487041_m1), <i>Mmp13</i> (Mm00439491_m1), <i>Adamts5</i> (Mm00478620_m1), <i>Alpl</i> (Mm00475834_m1), <i>Sp7</i> (Mm00504574_m1), <i>Col2a1</i> (Mm01309565_m1), <i>Agg</i> (Mm00545794_m1), <i>Hprt1</i> (Mm00446968_m1), <i>PTCH1</i> (Hs00181117_m1), <i>EVC</i> (Hs00205772_m1), <i>GLI1</i> (Hs00171790_m1), <i>IHH</i> (Hs01081801_m1), <i>IL1B</i> (Hs00174097_m1), <i>MMP13</i> ( ), <i>PTGS2</i> (Hs00610420_m1), <i>PTGER2</i> (Hs00168754_m1), <i>IL6</i> (Hs00174131_m1), <i>NOS2</i> (Hs00167257_m1), <i>CCL2</i> ( ), <i>HPRT1</i> (Hs99999909_m1) | Applied Biosystems, CA, USA      |
| Dulbecco's Modified Eagle Medium (DMEM) 1 g/L glucose                                                                                                                                                                                                                                                                                                                                                                                                                                                                                                                                                                                                                                                                                                    | Lonza, Basel, Switzerland        |
| Fetal bovine serum (FBS)                                                                                                                                                                                                                                                                                                                                                                                                                                                                                                                                                                                                                                                                                                                                 | Sigma-Aldrich, St Louis, MO, USA |
| L-Glutamine                                                                                                                                                                                                                                                                                                                                                                                                                                                                                                                                                                                                                                                                                                                                              | Lonza, Basel, Switzerland        |
| Penicillin-Streptomycin                                                                                                                                                                                                                                                                                                                                                                                                                                                                                                                                                                                                                                                                                                                                  | Lonza, Basel, Switzerland        |
| IL-1 beta                                                                                                                                                                                                                                                                                                                                                                                                                                                                                                                                                                                                                                                                                                                                                | Peprtech, London, UK             |

|                                                  |                                                  |
|--------------------------------------------------|--------------------------------------------------|
| Cyclopamine (CPA) (C4116)                        | Sigma-Aldrich, St Louis, MO, USA                 |
| Proteinase K                                     | Promega, Madison, WI, USA                        |
| Triton X-100                                     | Sigma-Aldrich, St Louis, MO, USA                 |
| Rabbit polyclonal anti-IHH (1/100; ab39634)      | Abcam, Cambridge, UK                             |
| Mouse polyclonal anti- COX-2 (1/100; ab88522).   | Abcam, Cambridge, UK                             |
| Fluoroshield with DAPI histology mounting medium | Sigma-Aldrich, St Louis, MO, USA                 |
| iScanCoreo Au version 3.3.3                      | Roche, Basel, Switzerland                        |
| Image Viewer software                            | Ventana Medical Systems, USA                     |
| Amersham Imager 600                              | Healthcare, Little Chalfont, Buckinghamshire, UK |
| Step One Plus Detection system                   | Applied Biosystems, CA, USA                      |
| G-power 3.1 software                             | G-power, Autenzell, Germany                      |
| GraphPad Prism 8 for Windows                     | GraphPad Software, San Diego, CA, USA            |

352

## 353 **Methods and Protocols**

### 354 **Animal model of OA**

355 Generation of *Evc<sup>flox/-</sup>*; *UBC-CreERT2* mice was previously described(28). These mice were  
356 maintained in a C57BL/6J;129 mixed background. Briefly, 10 weeks-old *Evc<sup>flox/-</sup>*; *UBC-CreERT2<sup>+/-</sup>*  
357 female mice received vehicle or 0.075 mg/g/day TAM administered in five intraperitoneal  
358 injections. Vehicle-treated mice were named as *Evc<sup>flox/-</sup>* and TAM-treated mice as *Evc<sup>CKO</sup>*.  
359 C57BL/6J;129 WT mice were used as controls due to unexpected low *Evc* levels in *Evc<sup>flox/-</sup>* mice  
360 (Sup.Fig.1). Mice were separated and housed in cages according to their genotype to avoid  
361 tamoxifen contamination, were exposed to 12-hour light/dark cycles, and had free access to  
362 water and standard chow. OA was induced at 12 weeks of age by destabilization of the medial  
363 meniscus (DMM) as previously described(28,45), and mice were assigned to groups of study  
364 according to their genotype and randomly distributed between healthy and DMM-operated:  
365 non-operated (NO)-WT (n=8), DMM-WT (n=6)and DMM-*Evc<sup>CKO</sup>* (n=6). After 8 weeks of OA  
366 progression, mice were euthanized and tissues and joints collected for histopathological and  
367 molecular analysis. Tissue samples from brain, lung, muscle, heart, bone and joints were  
368 immediately frozen for molecular biology studies. Animal handling and experimental  
369 procedures for this study (PROEX 119/16) complied with the national and international  
370 regulations, and the Guidelines for the Care and Use of Laboratory Animals (NIH), and were

371 approved by the Institutional Ethics and Welfare Committees of the IIS-Fundación Jiménez Díaz  
372 and Alberto Sols Biomedical Research Institute.

373

### 374 **Cartilage thickness analyses**

375 Cartilage thickness was evaluated in knee sections stained with Hematoxylin/Eosin and  
376 scanned with the iScanCoreo Au version 3.3.3 (Roche, Basel, Switzerland). A 500 µm line was  
377 drawn covering the center and posterior region of the joint in the femur using the Image  
378 Viewer software (Ventana Medical Systems, USA), and calcified cartilage area was calculated  
379 using the Image J software.

380

### 381 **Western blotting**

382 20 µg of protein extract from knee joints were separated by SDS-PAGE and transferred to  
383 nitrocellulose membranes as previously described(56,57). Membranes were incubated  
384 overnight at 4°C with the following antibodies: rabbit polyclonal anti-mouse MMP-13 (1/6000;  
385 ab39012; Abcam) and MMP-1 (1/500; ab137332; Abcam), and rabbit monoclonal anti-mouse  
386 MMP-3 (1/10000; ab52915; Abcam). Binding signal was detected with chemiluminescence in  
387 an Amersham Imager 600 (Healthcare, Little Chalfont, Buckinghamshire, UK). EZ-Blue gel  
388 staining reagent (Sigma) was used as loading control and densitometric measures were  
389 normalized by the average value of the NO-WT and expressed as arbitrary units (A.U.)(56–58).

390

### 391 **RNA isolation and gene expression assays**

392 RNA was isolated from frozen knees, prior crush in liquid nitrogen, by TRIzol reagent  
393 (MRC, Cincinnati, OH, USA) and retrotranscribed to cDNA as described elsewhere(56). RNA  
394 from chondrocyte cultures was also isolated with TRIzol reagent. Gene expression was  
395 quantified by real-time PCR using the Step One Plus Detection system (Applied Biosystems, CA,  
396 USA). TaqMan probes for mouse *Ptch1*, *Evc*, *Gli1*, *Ihh*, *Runx2*, *Col10a1*, *Mmp13*, A disintegrin  
397 and metalloproteinase with thrombospondin motifs 5 (*Adamts5*), Alkaline phosphatase (*Alpl*),  
398 Transcription factor SP7 (*Sp7*), type II collagen (*Col2a1*) and aggrecan (*Agg*), and TaqMan  
399 probes for human *PTCH1*, *EVC*, *GLI1*, *IHH*, *IL1B*, *MMP13*, prostaglandin G/H synthase 2 (*PTGS2*),  
400 prostaglandin E2 receptor (*PTGER2*), *IL6*, inducible nitric oxide synthase (*NOS2*) and monocyte  
401 chemoattractant protein-1 (*CCL2*) were purchased from Applied Biosystems. Gene expression  
402 levels were determined with the comparative Ct quantitation method using Hypoxanthine-  
403 guanine phosphoribosyltransferase (*Hprt1*, *HPRT1*) as internal control and expressed as  
404 arbitrary units (A.U.).

405

#### 406 **Human OA cartilage collection for chondrocyte isolation**

407 Human OA cartilage was obtained from patients undergoing knee joint replacement  
408 surgery (Fundación Jiménez Díaz Hospital), prior informed consent and approval from the  
409 Institutional Ethics Committee, and following the ethical principles of the Declaration of  
410 Helsinki and the Department of Health and Human Services Belmont Report. Chondrocytes  
411 were isolated as previously described(59).

412

#### 413 **Culture of human chondrocytes**

414 Human OA chondrocytes were seeded at a confluence of  $2 \cdot 10^5$  cells/well in p6 plates with  
415 Dulbecco's Modified Eagle Medium (DMEM) 1 g/L glucose, supplemented with 10% fetal  
416 bovine serum (FBS)(Sigma), 2 mM glutamine (Lonza), and 100 U/ml Penicillin-Streptomycin  
417 (PS) (Lonza). Experiments were performed in passage 2. Cells were FBS-depleted for 24 hours,  
418 and then stimulated with 1 ng/mL IL-1 beta (Peprotech, London, UK), and 10  $\mu$ M CPA (Sigma),  
419 a direct Hh antagonist(29), for 24 hours. Chondrocytes not stimulated with IL-1 beta nor CPA  
420 were used as control. Each experiment was performed with chondrocytes from different  
421 donors.

422

#### 423 **Immunofluorescence of human cartilage**

424 Immunofluorescence was performed based on previously described protocols(60). Briefly,  
425 3  $\mu$ m knee joint sections were deparafinized and rehydrated. Antigen retrieval was performed  
426 by incubation with 20  $\mu$ g/mL proteinase K (Promega, USA) for 20 minutes. Tissue sections were  
427 incubated with 0.1 M glycine for autofluorescence removal, and blocked with 3% PBS-bovine  
428 serum albumin (BSA), 0.1% Triton X-100 (Sigma), 5% FBS. Then cartilage sections were  
429 incubated with the corresponding primary antibodies: rabbit polyclonal anti-IHH (1/100;  
430 ab39634, Abcam) and mouse polyclonal anti-Cyclooxygenase-2 (COX-2) (1/100; ab88522;  
431 Abcam). Secondary FITC and TRITC respectively antibodies were used for detection of positive  
432 fluorescence signal. Tissue sections were ultimately incubated with 0.1% Sudan Black in 70%  
433 ethanol and mounted with Fluoroshield with DAPI histology mounting medium (Sigma).  
434 Sections were photographed with a MiCom fluorescence microscope equipped with ACT-1  
435 software at  $\times 40$  magnification.

436

#### 437 **Statistical analysis**

438 An animal model previously studied(28)was used for the attainment of the present  
439 research. Each limb was analyzed as an independent sample. Due to the lack of previous  
440 studies of OA in mice with *Evc* deletion, previously published data of an OA model with *Ihh*

441 deletion was used for the calculation of the sample size(18). The sample size was determined  
442 with the objective of detecting differences with respect to the articular cartilage damage score  
443 between OA and OA *Col2a1-CreERT2; Ihh<sup>fl/fl</sup>* mice. By accepting a significance level (alpha) of  
444 5% assuming a Bonferroni correction, and a statistical power of 80%, a pairwise t-test between  
445 conditions required 6 limbs per group to demonstrate an 86% (7 vs 1 damage score with the  
446 *OARSI Osteoarthritis Cartilage Histopathology Assessment System* (OOCHAS) scale assuming a  
447 standard deviation of 3 and 2 respectively. Sample size estimation was performed using the G-  
448 power 3.1 software (G-power, Autenzell, Germany)(61), which indicated no requirement of  
449 additional animals to the study in order to detect the expected differences in cartilage damage  
450 between groups.

451 Ordinary one-way ANOVA with Bonferroni post-hoc test was used for comparisons  
452 between groups with normal distribution of the data, based on Shapiro-Wilk normality test.  
453 Kruskal-Wallis test was used for comparisons between multiple groups where data lacked  
454 normality, followed by Dunn's post-hoc test. A P-value of less than 0.05 was considered  
455 statistically significant. Statistical analyses of data were performed using GraphPad Prism 8 for  
456 Windows (GraphPad Software, San Diego, CA, USA). Data were expressed as mean with  
457 standard error (SEM).

458

#### 459 **Acknowledgements**

460 This work was financially supported by grants from the Instituto de Salud Carlos III  
461 [PI15/00340, PI16/00065, PI18/00261] and Fondo Europeo de Desarrollo Regional (FEDER) and  
462 by grants SAF-2013-43365-R and SAF2016-75434-R to VLR-P. AL and PG were funded by  
463 Fundación Conchita Rábago. We would like to thank Dr. David Santamaria for providing UBC-  
464 *CreERT2* mice and María Gracia González Bueno for helping to organize mouse crosses and  
465 technical work.

466

#### 467 **Author contributions**

468 AL, VLR-P, RL and GH-B were in charge of conceptualization, formal analysis, and interpretation  
469 of data. VLR-P, GH-B and RL were responsible for the funding acquisition, provision of  
470 resources and project administration. AL, PG, LC, VLR-P, AP-C and RL were in charge of in  
471 charge of animal methodology design. LC, VLR-P and AP-C generated the genetically modified  
472 *Evc<sup>CKO</sup>* model, and AL, PG, SP-N and RL performed the animal procedures. AL and PG  
473 contributed to the acquisition of data, investigation and visualization. AL, PG, LC, VLR-P, AP-C,  
474 SP-N, AM, GH-B and RL were involved in the writing process and drafting the article and its  
475 revision and editing, and approved the final manuscript to be published. GH-B and RL have full

476 access to overall data and take responsibility for the supervision, validation, integrity and  
477 accuracy of the data analysis.

478

479 **Conflict of interest**

480 AL, PG, LC, VLR-P, AP-C, SP-N, AM, GH-B and RL do not have any disclosures.

481

482 **REFERENCES**

- 483 1. Singh P, Marcu KB, Goldring MB, Otero M. Phenotypic instability of chondrocytes in  
484 osteoarthritis: on a path to hypertrophy. *Annals of the New York Academy of Sciences*.  
485 2018;1442(1):17-34.
- 486 2. Ripmeester EG, Timur UT, Caron MM, Welting TJ. Recent Insights into the Contribution of  
487 the Changing Hypertrophic Chondrocyte Phenotype in the Development and Progression  
488 of Osteoarthritis. *Frontiers in Bioengineering and Biotechnology*. 2018;6(18):1-25.
- 489 3. Martel-Pelletier J, Barr AJ, Cicuttini FM, Conaghan PG, Cooper C, Goldring MB, et al.  
490 Osteoarthritis. *Nature Reviews Disease Primers*. 2016;2(16072).
- 491 4. Loeser RF, Goldring SR, Scanzello CR, Goldring MB. Osteoarthritis: A disease of the joint  
492 as an organ. *Arthritis and Rheumatism*. 2012;64(6):1697-707.
- 493 5. Herrero-Beaumont G, Pérez-Baos S, Sánchez-Pernaute O, Roman-Blas JA, Lamuedra A,  
494 Largo R. Targeting chronic innate inflammatory pathways, the main road to prevention of  
495 osteoarthritis progression. *Biochemical Pharmacology*. 2019;165:24-32.
- 496 6. Dunaeva M, Waltenberger J. Hh signaling in regeneration of the ischemic heart. *Cellular  
497 and Molecular Life Sciences*. 2017;74(19):3481-90.
- 498 7. Giarretta I, Gaetani E, Bigossi M, Tondi P, Asahara T, Pola R. The Hedgehog Signaling  
499 Pathway in Ischemic Tissues. *International journal of molecular sciences*. 2019;20(21):1-  
500 19.
- 501 8. Kozhemyakina E, Lassar AB, Zelzer E. A pathway to bone: signaling molecules and  
502 transcription factors involved in chondrocyte development and maturation.  
503 *Development*. 2015;142(5):817-31.
- 504 9. Petrova R, Joyner AL. Roles for Hedgehog signaling in adult organ homeostasis and  
505 repair. *Development (Cambridge, England)*. 2014;141(18):3445-57.
- 506 10. Ruhlen R, Marberry K. The chondrocyte primary cilium. *Osteoarthritis and Cartilage*.  
507 2014;22(8):1071-6.
- 508 11. Briscoe J, Théron PP. The mechanisms of Hedgehog signalling and its roles in  
509 development and disease. *Nature Reviews Molecular Cell Biology*. 2013;14(7):416-29.
- 510 12. Caparros-Martin JA, Valencia M, Reytor E, Pacheco M, Fernandez M, Perez-Aytes A, et al.  
511 The ciliary Evc / Evc2 complex interacts with Smo and controls Hedgehog pathway  
512 activity in chondrocytes by regulating Sufu / Gli3 dissociation and Gli3 trafficking in  
513 primary cilia. *Human Molecular Genetics*. 2013;22(1):124-39.



- 514 13. Zhou J, Wei X, Wei L. Indian Hedgehog, a critical modulator in osteoarthritis, could be a  
515 potential therapeutic target for attenuating cartilage degeneration disease. *Connective*  
516 *Tissue Research*. 2014;55(4):257-61.
- 517 14. Lin AC, Seeto BL, Bartoszko JM, Khoury MA, Whetstone H, Ho L, et al. Modulating  
518 hedgehog signaling can attenuate the severity of osteoarthritis. *Nature Medicine*.  
519 2009;15(12):1421-5.
- 520 15. Zhang C, Wei X, Chen C, Cao K, Li Y, Jiao Q. Indian Hedgehog in Synovial Fluid Is a Novel  
521 Marker for Early Cartilage Lesions in Human Knee Joint. 2014;7250-65.
- 522 16. Gratal P, Mediero A, Sánchez-Pernaute O, Prieto-Potin I, Lamuedra A, Herrero-Beaumont  
523 G, et al. Chondrocyte enlargement is a marker of osteoarthritis severity. *Osteoarthritis*  
524 *and Cartilage*. 2019;27(8).
- 525 17. Wei F, Zhou J, Wei X, Zhang J, Fleming BC, Terek R, et al. Activation of Indian hedgehog  
526 promotes chondrocyte hypertrophy and upregulation of MMP-13 in human  
527 osteoarthritic cartilage. *Osteoarthritis and Cartilage*. 2012;20(7):755-63.
- 528 18. Zhou J, Chen Q, Lanske B, Fleming BC, Terek R, Wei X, et al. Disrupting the Indian  
529 hedgehog signaling pathway in vivo attenuates surgically induced osteoarthritis  
530 progression in Col2a1-CreERT2; Ihhf1/fl mice. *Arthritis Research and Therapy*.  
531 2014;16(1):R11.
- 532 19. Takada S, Nakamura E, Sabanai K, Tsukamoto M, Otomo H, Kanoh S, et al. Attenuation of  
533 Post-Traumatic Osteoarthritis After Anterior Cruciate Ligament Injury Via Inhibition of  
534 Hedgehog Signaling. *Journal of Orthopaedic Research*. 2019;
- 535 20. Liu Q, Wu Z, Hu D, Zhang L, Wang L, Liu G. Low dose of indomethacin and Hedgehog  
536 signaling inhibitor administration synergistically attenuates cartilage damage in  
537 osteoarthritis by controlling chondrocytes pyroptosis. *Gene*. 2019;712(143959).
- 538 21. Li R, Cai L, Ding J, Hu CM, Wu TN, Hu XY. Inhibition of hedgehog signal pathway by  
539 cyclopamine attenuates inflammation and articular cartilage damage in rats with  
540 adjuvant-induced arthritis. *Journal of Pharmacy and Pharmacology*. 2015;67(7):963-71.
- 541 22. Shen F, Cheng L, Douglas AE, Riobo NA, Manning DR. Smoothed is a fully competent  
542 activator of the heterotrimeric G protein G(i). *Mol Pharmacol*. marzo de 2013;83(3):691-  
543 7.
- 544 23. Peluso MO, Campbell VT, Harari JA, Tibbitts TT, Proctor JL, Whitebread N, et al. Impact of  
545 the Smoothed inhibitor, IPI-926, on smoothed ciliary localization and Hedgehog  
546 pathway activity. *PLoS One*. 2014;9(3):e90534.
- 547 24. Rimkus TK, Carpenter RL, Qasem S, Chan M, Lo H-W. Targeting the Sonic Hedgehog  
548 Signaling Pathway: Review of Smoothed and GLI Inhibitors. *Cancers (Basel)*. 15 de  
549 febrero de 2016;8(2):E22.
- 550 25. Gutzmer R, Solomon JA. Hedgehog Pathway Inhibition for the Treatment of Basal Cell  
551 Carcinoma. *Target Oncol*. junio de 2019;14(3):253-67.

- 552 26. Ruiz-Perez VL, Blair HJ, Rodriguez-Andres ME, Blanco MJ, Wilson A, Liu Y-N, et al. Evc is a  
553 positive mediator of Ihh-regulated bone growth that localises at the base of chondrocyte  
554 cilia. *Development*. 2007;134(16):2903-12.
- 555 27. Zhang XM, Ramalho-Santos M, McMahon AP. Smoothened mutants reveal redundant  
556 roles for Shh and Ihh signaling including regulation of L/R asymmetry by the mouse node.  
557 *Cell*. 2001;106(2):781-92.
- 558 28. Lamuedra A, Gratal P, Calatrava L, Ruiz-Perez VL, Largo R, Herrero-Beaumont G.  
559 Disorganization of chondrocyte columns in the growth plate does not aggravate  
560 experimental osteoarthritis in mice. *Scientific Reports*. 2020;10(1):1-13.
- 561 29. Bruce SJ, Butterfield NC, Metzis V, Town L, McGlenn E, Wicking C. Inactivation of  
562 patched1 in the mouse limb has novel inhibitory effects on the chondrogenic program.  
563 *Journal of Biological Chemistry*. 2010;285(36):27967-81.
- 564 30. Xu T, Xu G, Gu Z, Wu H. Hedgehog signal expression in articular cartilage of rat  
565 temporomandibular joint and association with adjuvant-induced osteoarthritis. *J Oral*  
566 *Pathol Med*. abril de 2017;46(4):284-91.
- 567 31. Will AJ, Cova G, Osterwalder M, Chan WL, Wittler L, Brieske N, et al. Composition and  
568 dosage of a multipartite enhancer cluster control developmental expression of Ihh  
569 (Indian hedgehog). *Nature Genetics*. 2017;49(10):1539-45.
- 570 32. Sasai N, Toriyama M, Kondo T. Hedgehog Signal and Genetic Disorders. *Front Genet*. 8 de  
571 noviembre de 2019;10:1103.
- 572 33. Anvarian Z, Mykytyn K, Mukhopadhyay S, Pedersen LB, Christensen ST. Cellular signalling  
573 by primary cilia in development, organ function and disease. *Nat Rev Nephrol*. abril de  
574 2019;15(4):199-219.
- 575 34. Wang C, Cassandras M, Peng T. The Role of Hedgehog Signaling in Adult Lung  
576 Regeneration and Maintenance. *J Dev Biol*. 9 de julio de 2019;7(3):E14.
- 577 35. Abe Y, Tanaka N. Roles of the Hedgehog Signaling Pathway in Epidermal and Hair Follicle  
578 Development, Homeostasis, and Cancer. *J Dev Biol*. 20 de noviembre de 2017;5(4):E12.
- 579 36. Peer E, Tesanovic S, Aberger F. Next-Generation Hedgehog/GLI Pathway Inhibitors for  
580 Cancer Therapy. *Cancers (Basel)*. 15 de abril de 2019;11(4):E538.
- 581 37. Cortes JE, Gutzmer R, Kieran MW, Solomon JA. Hedgehog signaling inhibitors in solid and  
582 hematological cancers. *Cancer Treat Rev*. junio de 2019;76:41-50.
- 583 38. Lacouture ME, Dréno B, Ascierto PA, Dummer R, Basset-Seguín N, Fife K, et al.  
584 Characterization and Management of Hedgehog Pathway Inhibitor-Related Adverse  
585 Events in Patients With Advanced Basal Cell Carcinoma. *Oncologist*. octubre de  
586 2016;21(10):1218-29.
- 587 39. Rohatgi R, Milenkovic L, Corcoran RB, Scott MP. Hedgehog signal transduction by  
588 Smoothened: Pharmacologic evidence for a 2-step activation process. *Proceedings of the*  
589 *National Academy of Sciences of the United States of America*. 2009;106(9):3196-201.

- 590 40. Chen JK, Taipale J, Cooper MK, Beachy PA. Inhibition of Hedgehog signaling by direct  
591 binding of cyclopamine to Smoothened. *Genes and Development*. 2002;16(21):2743-8.
- 592 41. Zhang XM, Ramalho-Santos M, McMahon AP. Smoothened mutants reveal redundant  
593 roles for Shh and Ihh signaling including regulation of L/R asymmetry by the mouse node.  
594 *Cell*. 2001;106(2):781-92.
- 595 42. Pietrobono S, Gagliardi S, Stecca B. Non-canonical Hedgehog Signaling Pathway in  
596 Cancer: Activation of GLI Transcription Factors Beyond Smoothened. *Front Genet*.  
597 2019;10:556.
- 598 43. Didiasova M, Schaefer L, Wygrecka M. Targeting GLI Transcription Factors in Cancer.  
599 *Molecules*. 24 de abril de 2018;23(5):E1003.
- 600 44. Wang Y, Ding Q, Yen C-J, Xia W, Izzo JG, Lang J-Y, et al. The crosstalk of mTOR/S6K1 and  
601 Hedgehog pathways. *Cancer Cell*. 20 de marzo de 2012;21(3):374-87.
- 602 45. Glasson SS, Blanchet TJ, Morris EA. The surgical destabilization of the medial meniscus  
603 (DMM) model of osteoarthritis in the 129/SvEv mouse. *Osteoarthritis and Cartilage*.  
604 septiembre de 2007;15(9):1061-9.
- 605 46. Pacheco M, Valencia M, Caparrós-Martín JA, Mulero F, Goodship JA, Ruiz-Perez VL. Evc  
606 works in chondrocytes and osteoblasts to regulate multiple aspects of growth plate  
607 development in the appendicular skeleton and cranial base. *Bone*. enero de  
608 2012;50(1):28-41.
- 609 47. Tao F, Jiang T, Tao H, Cao H, Xiang W. Primary cilia: Versatile regulator in cartilage  
610 development. *Cell Prolif*. marzo de 2020;53(3):e12765.
- 611 48. McGlashan SR, Cluett EC, Jensen CG, Poole CA. Primary cilia in osteoarthritic  
612 chondrocytes: from chondrons to clusters. *Dev Dyn*. agosto de 2008;237(8):2013-20.
- 613 49. Thompson CL, Chapple JP, Knight MM. Primary cilia disassembly down-regulates  
614 mechanosensitive hedgehog signalling: a feedback mechanism controlling ADAMTS-5  
615 expression in chondrocytes. *Osteoarthritis Cartilage*. marzo de 2014;22(3):490-8.
- 616 50. Chang C-F, Ramaswamy G, Serra R. Depletion of primary cilia in articular chondrocytes  
617 results in reduced Gli3 repressor to activator ratio, increased Hedgehog signaling, and  
618 symptoms of early osteoarthritis. *Osteoarthritis Cartilage*. febrero de 2012;20(2):152-61.
- 619 51. Potocki L, Abuelo DN, Oyer CE. Cardiac malformation in two infants with  
620 hypochondrogenesis. *Am J Med Genet*. 20 de noviembre de 1995;59(3):295-9.
- 621 52. Muscatello LV, Benazzi C, Dittmer KE, Thompson KG, Murgiano L, Drögemüller C, et al.  
622 Ellis-van Creveld Syndrome in Grey Alpine Cattle: Morphologic, Immunophenotypic, and  
623 Molecular Characterization. *Vet Pathol*. septiembre de 2015;52(5):957-66.
- 624 53. Thompson CL, Patel R, Kelly T-AN, Wann AKT, Hung CT, Chapple JP, et al. Hedgehog  
625 signalling does not stimulate cartilage catabolism and is inhibited by Interleukin-1 $\beta$ .  
626 *Arthritis Res Ther*. 24 de diciembre de 2015;17:373.

- 627 54. Lee JJ, Rothenberg ME, Seeley ES, Zimdahl B, Kawano S, Lu W-J, et al. Control of  
628 inflammation by stromal Hedgehog pathway activation restrains colitis. Proc Natl Acad  
629 Sci U S A. 22 de noviembre de 2016;113(47):E7545-53.
- 630 55. Zhou X, Liu Z, Jang F, Xiang C, Li Y, He Y. Autocrine Sonic hedgehog attenuates  
631 inflammation in cerulein-induced acute pancreatitis in mice via upregulation of IL-10.  
632 PLoS One. 2012;7(8):e44121.
- 633 56. Pérez-baos S, Gratal P, Barrasa JI, Lamuedra A, Sánchez-pernate O, Herrero-beaumont  
634 G, et al. Inhibition of pSTAT1 by tofacitinib accounts for the early improvement of  
635 experimental chronic synovitis. 2019;2:1-10.
- 636 57. Tardio L, Andrés-Bergós J, Zachara NE, Larrañaga-Vera A, Rodríguez-Villar C, Herrero-  
637 Beaumont G, et al. O-linked N-acetylglucosamine (O-GlcNAc) protein modification is  
638 increased in the cartilage of patients with knee osteoarthritis. Osteoarthritis and  
639 Cartilage. 2014;
- 640 58. Larrañaga-Vera A, Lamuedra A, Pérez-Baos S, Prieto-Potin I, Peña L, Herrero-Beaumont G,  
641 et al. Increased synovial lipodystrophy induced by high fat diet aggravates synovitis in  
642 experimental osteoarthritis. Arthritis Research and Therapy. 2017;19(1):264.
- 643 59. Villalvilla A, Gomez R, Lugo L, Lopez-Oliva F, Largo R, Herrero-Beaumont G. Aromatase  
644 expression in human chondrocytes: An induction due to culture. Maturitas. 2016;85:27-  
645 33.
- 646 60. Mediero A, Wilder T, Ramkhelawon B, Moore KJ, Cronstein BN. Netrin-1 and its receptor  
647 Unc5b are novel targets for the treatment of inflammatory arthritis. FASEB Journal.  
648 2016;30(11):3835-44.
- 649 61. Faul F, Erdfelder E, Lang A-G, Buchner A. G \* Power 3 : A flexible statistical power analysis  
650 program for the social , behavioral , and biomedical sciences. Behavior Research  
651 Methods. 2007;39(2):175-91.

652

## 653 **FIGURE LEGENDS**

654 **Figure 1. Gene expression of Hedgehog (Hh) mediators in the OA *Evc*<sup>CKO</sup> model and cartilage**  
655 **structure.** Gene expression of *Ptch1* (A), *Gli1* (B), *Evc* (C) and *Ihh* (D) in the knees of NO-WT,  
656 DMM-WT and DMM-*Evc*<sup>CKO</sup> mice. Data are represented as the individual measurements of each  
657 joint and expressed as mean ± SEM (NO-WT n≥7; DMM-WT n≥7; DMM-*Evc*<sup>CKO</sup> n≥7).

658

659 **Figure 2. Metalloproteinases (MMP) protein levels in mouse knee joints.** Protein levels of  
660 MMP-13 (A), MMP-1 (B) and MMP-3 (C) in the knees of NO-WT, DMM-WT and DMM-*Evc*<sup>CKO</sup>  
661 mice and their representative western blots (D,E,F). Gene expression of *Col2a1* (G) and *Agg*  
662 (H), in the knees of NO-WT, DMM-WT and DMM-*Evc*<sup>CKO</sup> mice. Data are represented as the  
663 individual measurements of each joint and expressed as mean ± SEM (NO-WT n≥7; DMM-WT  
664 n≥7; DMM-*Evc*<sup>CKO</sup> n≥7).

665

666 **Figure 3. Effect of *Evc* deletion on OA-associated chondrocyte hypertrophy *in vivo*.** Gene  
667 expression of chondrocyte hypertrophic markers *Runx2* (A), *Col10a1* (B), *Mmp13* (C) and  
668 *Adamts5* (D), *Alpl* (E) and *Sp7* (F) in the knees of NO-WT, DMM-WT and DMM-*Evc*<sup>ckO</sup> mice.  
669 Representative femur cartilage sections stained with Hematoxylin/Eosin (G). Cartilage  
670 thickness in femur calcified cartilage of NO-WT, DMM-WT and DMM-*Evc*<sup>ckO</sup> mice (H). Data are  
671 represented as the individual measurements of each joint and expressed as mean ± SEM (NO-  
672 WT n≥7; DMM-WT n≥7; DMM-*Evc*<sup>ckO</sup> n≥7).

673

674 **Figure 4. Co-localization of hypertrophic and inflammatory markers in human cartilage.**  
675 Immunofluorescence of IHH (A) and cyclooxygenase-2 (COX-2) (B), chondrocyte nuclei staining  
676 with DAPI (C) and merge (D) in human OA cartilage samples.

677

678 **Figure 5. Inflammatory effect of IL-1 beta on human OA chondrocytes *in vitro*.** Gene  
679 expression of Hh signaling mediators *PTCH1* (A), *EVC* (B), *GLI1* (C) and *IHH* (D) and  
680 proinflammatory mediators *IL1B* (E), *MMP13* (F), prostaglandin G/H synthase 2 (*PTGS2*) (G),  
681 prostaglandin E2 receptor (*PTGER2*) (H), *IL6* (I), inducible nitric oxide synthase (*NOS2*) (J) and  
682 monocyte chemoattractant protein-1 (*CCL2*) (K) in human OA chondrocytes treated with IL-1  
683 beta and CPA, or vehicle (DMSO), for 24 hours. Data are normalized by chondrocytes in basal  
684 conditions (no IL-1 beta, no CPA stimulation) and expressed as mean ± SEM (n=5 independent  
685 experiments).

686

687 **Supplementary Figure 1. *Evc* mRNA levels in tissues of WT, *Evc*<sup>flox/-</sup> and *Evc*<sup>ckO</sup> animals.** *Evc*  
688 gene expression in lung (A), heart (B), brain (C), muscle (D) and bone (E) of WT, *Evc*<sup>flox/-</sup> and  
689 *Evc*<sup>ckO</sup> mice. Data are normalized with respect to *Evc* mRNA levels in WT mice and expressed as  
690 mean ± SEM (WT n=6; *Evc*<sup>flox/-</sup> n = 6; *Evc*<sup>ckO</sup> n≥3 for lung, brain, muscle and heart; WT n=1;  
691 *Evc*<sup>flox/-</sup> n = 1; *Evc*<sup>ckO</sup> n = 1 for bone – pool of tibiae –).

692

693 **Table 1. Histopathological cartilage score in mouse knee joints.** OARSI score in NO-WT, DMM-  
694 WT and DMM-*Evc*<sup>ckO</sup> mouse knee joints. Data are expressed as mean ± SEM (NO-WT n=10;  
695 DMM-WT n=11; DMM-*Evc*<sup>ckO</sup> n=11). \*p<0.05 vs NO-WT, #p<0.05 vs DMM-WT.

**Figure 1**

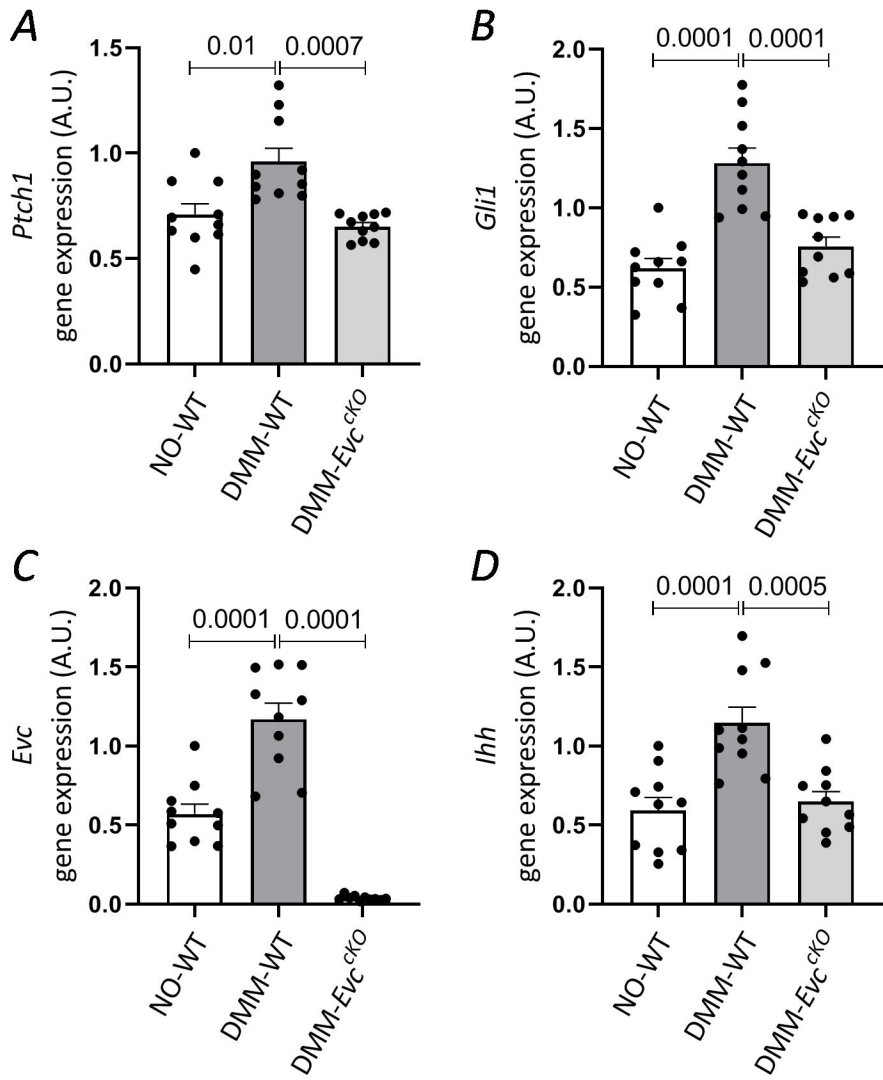

**Figure 2**

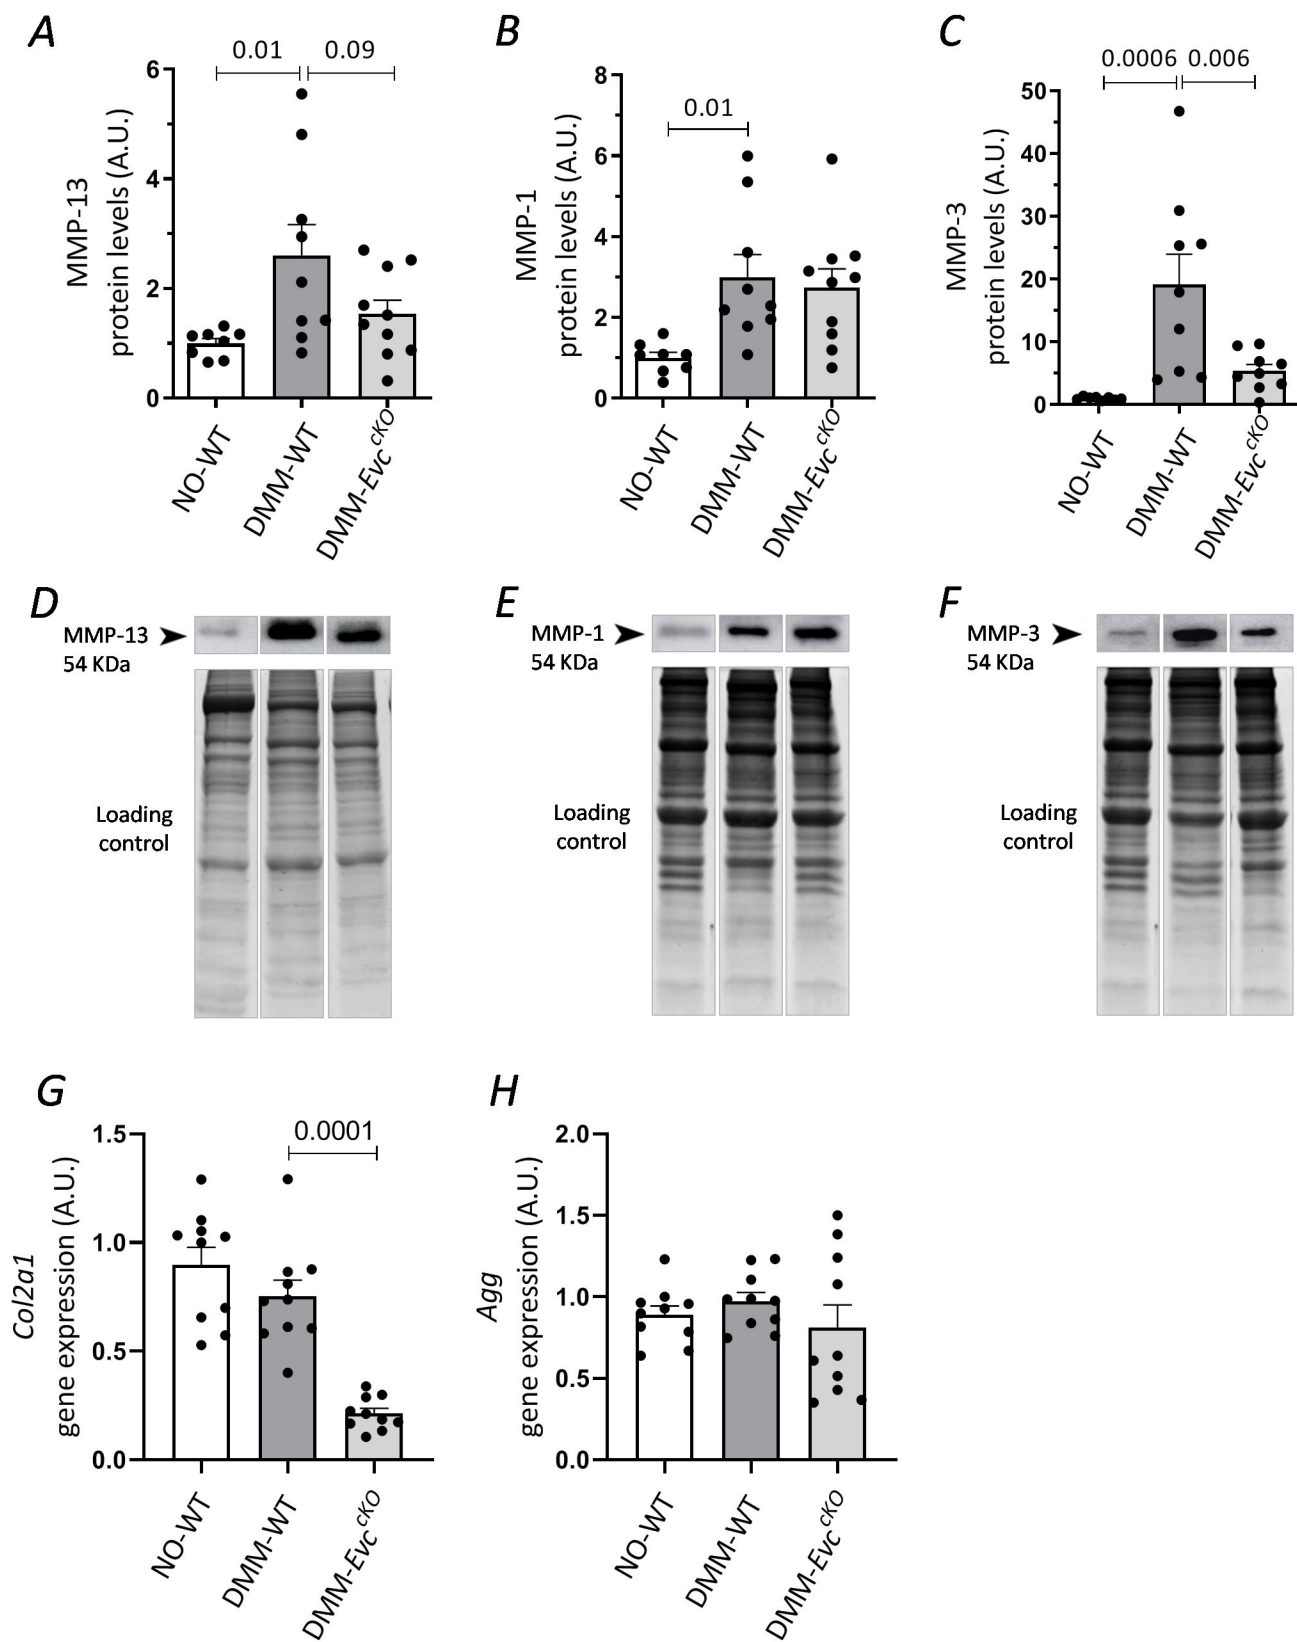

**Figure 3**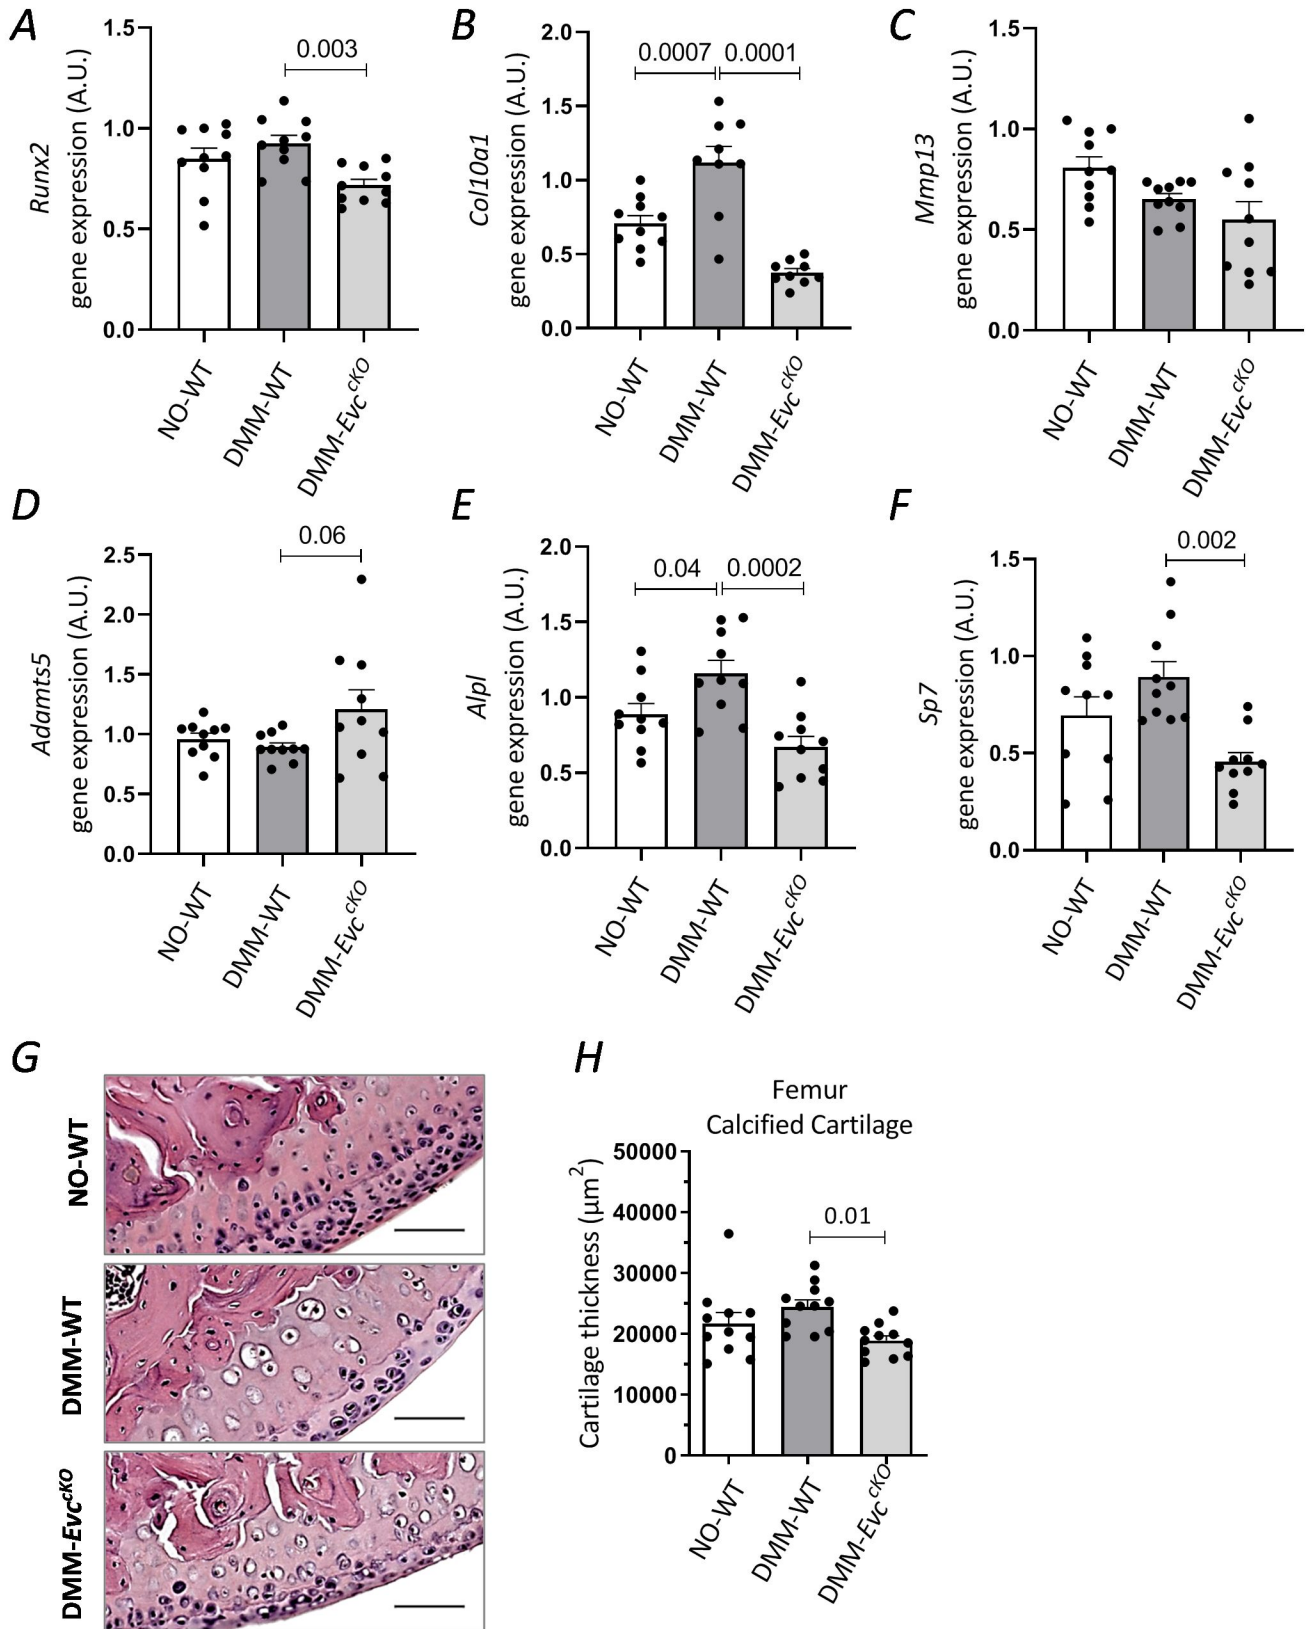



Figure 4

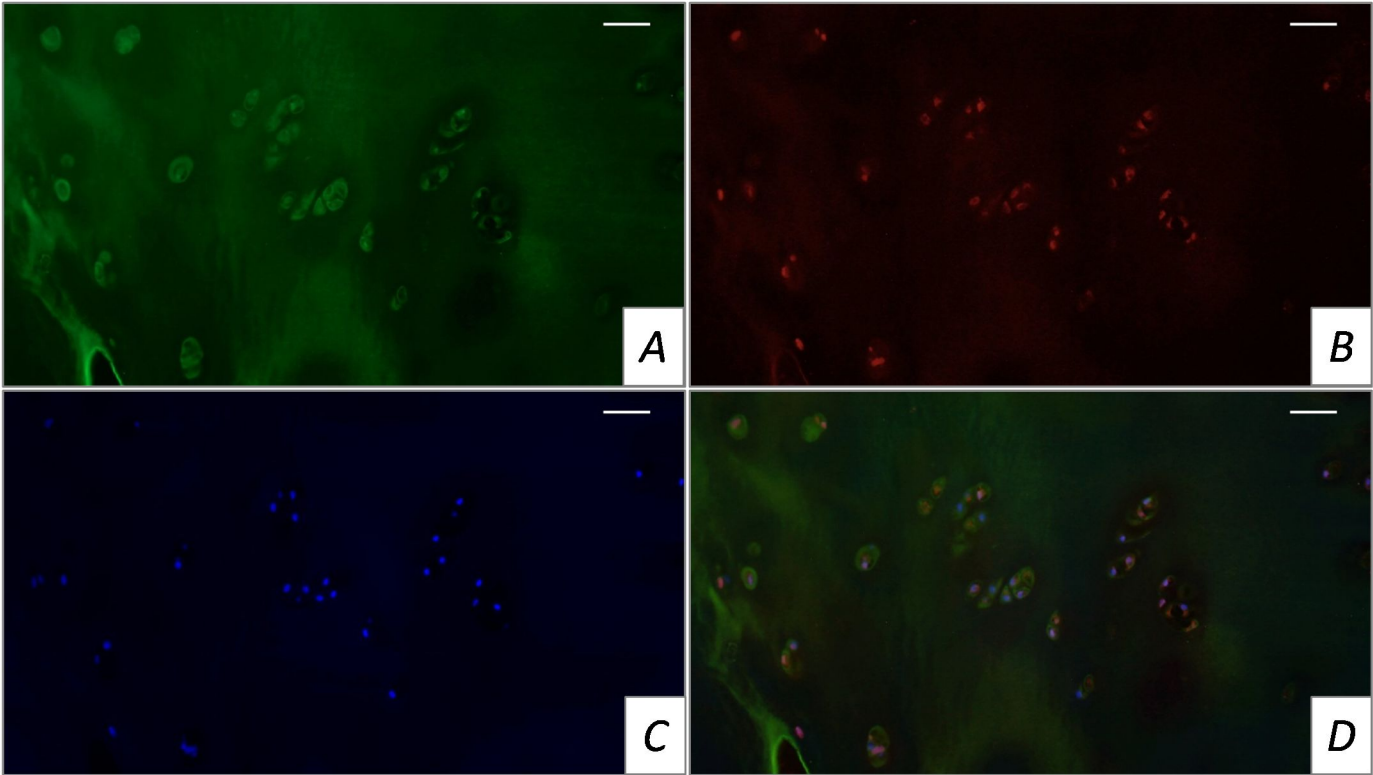

**Figure 5**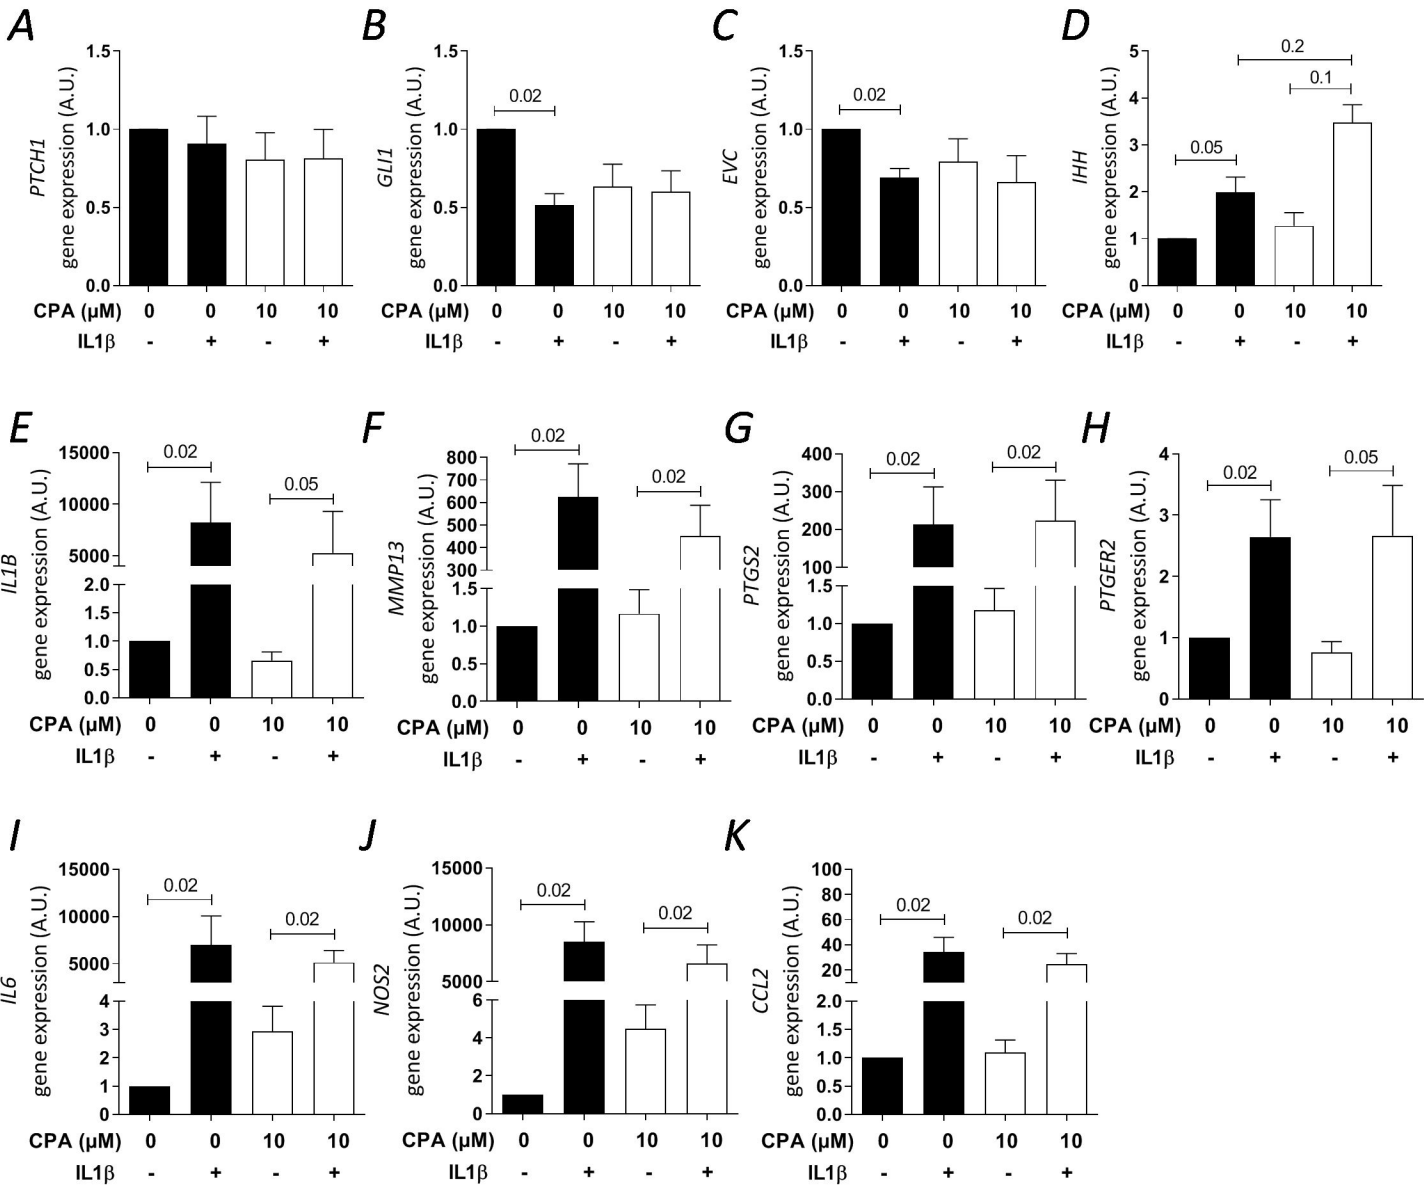

# Supplementary Figure 1

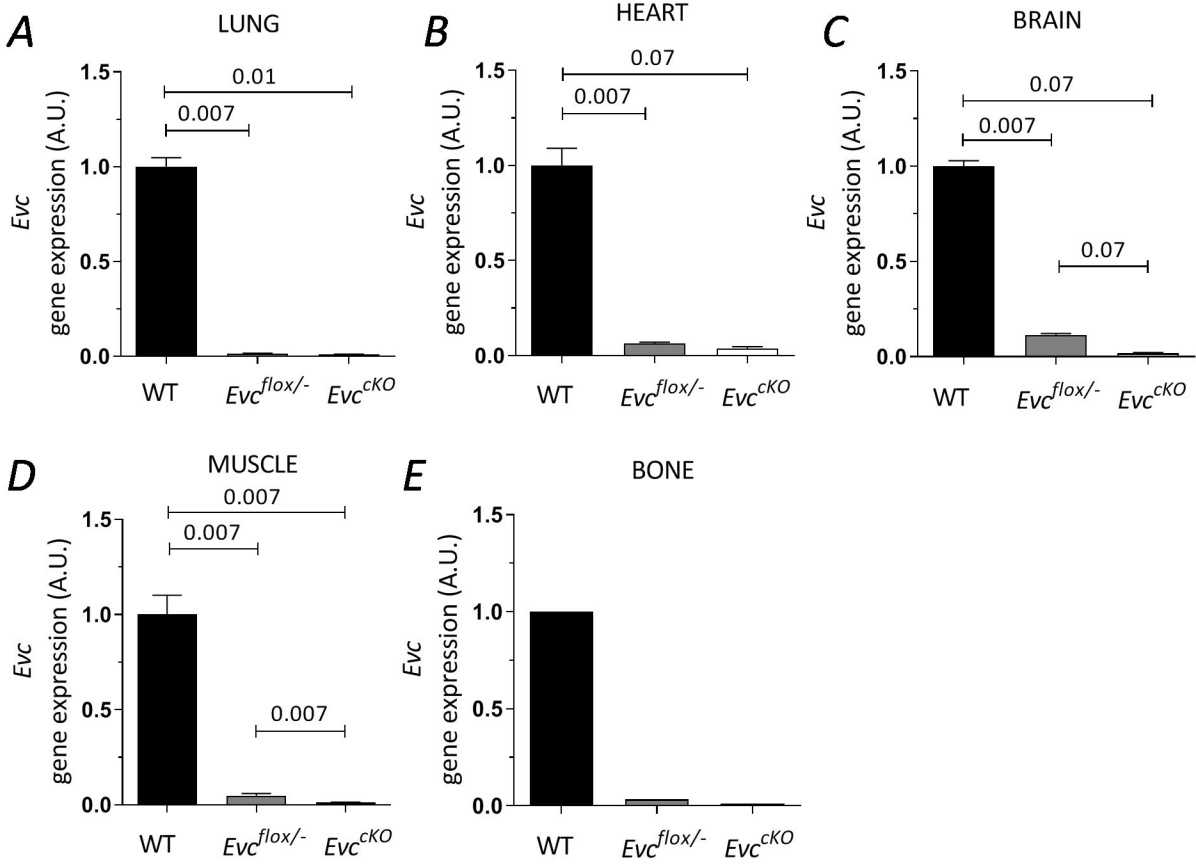

**Table 1**

| <b>Table 1</b> Histopathological score in mouse knee joints |              |                |                               |
|-------------------------------------------------------------|--------------|----------------|-------------------------------|
| Group                                                       | NO-WT        | DMM-WT         | DMM- <i>Evc<sup>cko</sup></i> |
| OARSI Score (SEM)                                           | 1.15 (0.198) | 2.818 (0.615)* | 2.727 (0.718)                 |
